# Supplementary material
Source: MDPI journal article supplement (https://www.mdpi.com/2079-9276/9/6/61)
Supplement: s1 [file s1]

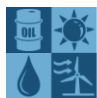

**Table S1.** Equation parameters of linear regression models between nitrogen (N) concentrations in switchgrass biomass as a function of the amount of N applied in 2008, 2009, and 2010.

|                              |           | Value   | Standard Error | t-Value  | Prob> t  |
|------------------------------|-----------|---------|----------------|----------|----------|
| N (g kg <sup>-1</sup> ) 2008 | Intercept | 3.09467 | 0.19473        | 15.89243 | 4.44E-16 |
|                              | Slope     | 0.00467 | 0.00139        | 3.37181  | 0.00207  |
| N (g kg <sup>-1</sup> ) 2009 | Intercept | 3.3276  | 0.15503        | 21.46484 | 0.00E+00 |
|                              | Slope     | 0.00372 | 0.0011         | 3.37022  | 0.00208  |
| N (g kg <sup>-1</sup> ) 2010 | Intercept | 3.2008  | 0.34572        | 9.25845  | 2.67E-10 |
|                              | Slope     | 0.00549 | 0.00246        | 2.23246  | 0.0332   |

**Table S2.** Equation parameters between acid detergent fiber (ADF), neutral detergent fiber (NDF), and total digestible nutrients (TDN) and nitrogen application rates in 2009 and 2010.

|      |           | Value     | Standard Error | t-Value   | Prob> t  |
|------|-----------|-----------|----------------|-----------|----------|
| 2009 |           |           |                |           |          |
| ADF  | Intercept | 560.58879 | 6.56641        | 85.37216  | 0.00E+00 |
|      | Slope     | 0.22279   | 0.04672        | 4.76902   | 4.47E-05 |
| NDF  | Intercept | 857.13504 | 3.98745        | 214.95837 | 0.00E+00 |
|      | Slope     | 0.07247   | 0.02837        | 2.55475   | 0.01594  |
| TDN  | Intercept | 452.30133 | 5.11523        | 88.4224   | 0.00E+00 |
|      | Slope     | -0.17355  | 0.03639        | -4.76902  | 4.47E-05 |
| 2010 |           |           |                |           |          |
| ADF  | Intercept | 463.2     | 10.46634       | 44.25718  | 3.53E-28 |
|      | B1        | 0.79      | 0.20788        | 3.81384   | 6.62E-04 |
|      | B2        | -0.003    | 8.50E-04       | -3.09429  | 0.00434  |
| NDF  | Intercept | 768.66311 | 6.23575        | 123.26724 | 0.00E+00 |
|      | Slope     | 0.09045   | 0.04436        | 2.03883   | 0.05036  |
| TDN  | Intercept | 479.02614 | 9.53941        | 50.21546  | 0.00E+00 |
|      | Slope     | -0.1827   | 0.06787        | -2.69201  | 0.0115   |

**Table S3.** Equation parameters of linear regression models between nitrogen (N) concentrations in switchgrass biomass as a function of accumulated growing degree days (AGDD) in 2008, 2009, and 2010.

|                              |           | Value    | Standard Error | t-Value  | Prob> t  |
|------------------------------|-----------|----------|----------------|----------|----------|
| N (g kg <sup>-1</sup> ) 2008 | Intercept | 12.25831 | 1.36464        | 8.9828   | 4.53E-08 |
|                              | Slope     | -0.00326 | 6.60E-04       | -4.94581 | 1.04E-04 |
| N (g kg <sup>-1</sup> ) 2009 | Intercept | 16.47629 | 0.94385        | 17.45639 | 2.24E-14 |
|                              | Slope     | -0.00461 | 4.12E-04       | -11.173  | 1.55E-10 |
| N (g kg <sup>-1</sup> ) 2010 | Intercept | 10.52159 | 1.05806        | 9.94418  | 9.73E-09 |
|                              | Slope     | -0.00233 | 4.17E-04       | -5.58885 | 2.64E-05 |

**Table S4.** Equation parameters between acid detergent fiber (ADF), neutral detergent fiber (NDF), and total digestible nutrients (TDN) and accumulated growing degree days (AGDD) in 2008, 2009, and 2010.

|      |           | Value     | Standard Error | t-Value   | Prob> t  |
|------|-----------|-----------|----------------|-----------|----------|
| 2008 |           |           |                |           |          |
| ADF  | Intercept | 220.3018  | 15.45773       | 14.25188  | 3.02E-11 |
|      | Slope     | 0.12935   | 0.00748        | 17.29895  | 1.16E-12 |
| NDF  | Intercept | 255.56094 | 26.01287       | 9.8244    | 1.17E-08 |
|      | Slope     | 0.19888   | 0.01258        | 15.80585  | 5.35E-12 |
| TDN  | Intercept | 717.37351 | 12.04283       | 59.56853  | 3.95E-22 |
|      | Slope     | -0.10076  | 0.00583        | -17.29758 | 1.16E-12 |
| 2009 |           |           |                |           |          |
| ADF  | Intercept | 306.69471 | 37.00323       | 8.28832   | 9.05E-07 |
|      | Slope     | 0.09263   | 0.01769        | 5.2356    | 1.26E-04 |
| NDF  | Intercept | 561.37319 | 41.79875       | 13.43038  | 2.18E-09 |
|      | Slope     | 0.10655   | 0.01998        | 5.33138   | 1.06E-04 |
| TDN  | Intercept | 664.83394 | 38.77938       | 17.144    | 8.59E-11 |
|      | Slope     | -0.09707  | 0.01854        | -5.2356   | 1.26E-04 |
| 2010 |           |           |                |           |          |
| ADF  | Intercept | 398.83343 | 24.21506       | 16.47047  | 2.67E-12 |
|      | Slope     | 0.05825   | 0.00955        | 6.0998    | 9.19E-06 |
| TDN  | Intercept | 578.01027 | 18.92575       | 30.54095  | 5.85E-17 |
|      | Slope     | -0.0452   | 0.00746        | -6.05643  | 1.00E-05 |
